# Supplementary material
Source: PubMed Central journal article supplement (PMC3886711)
Supplement: NIHMS542966-supplement-Supplemental_Material.pdf [file NIHMS542966-supplement-Supplemental_Material.pdf]

## SUPPLEMENTAL MATERIAL

### Supplemental Figure 1

Videos: corresponding movies of 3D volume rendering with rotating  $360^{\circ}$  viewing angles of 3D MRM image stacks from Figure 3: (A) no-treatment allograft heart; (B) native heart from the same no-treatment animal as A; (C) clodronate-liposome-treated allograft heart; (D) native heart from the same clodronate-liposome-treated animal as C; (E) PBS-liposome-treated allograft heart; and (F) native heart from the same PBS-liposome-treated animal as E.

**Supplemental Figure 2**

Representative optical micrographs of a clodronate-liposome treated allograft harvested on POD 9. A and D are two neighboring 5- $\mu\text{m}$  sections with immunohistochemical staining with anti-rat ED1 antibody for macrophages and Perl's Prussian blue staining for iron, respectively. B and E are the expansion of the boxed region in A and D. C and F are enlarged regions from B and E to illustrate that the iron-positive cells (blue color, black arrows) are all ED1+ macrophages (Brown color, red arrows), though not all the ED1+ cells contain iron particles.

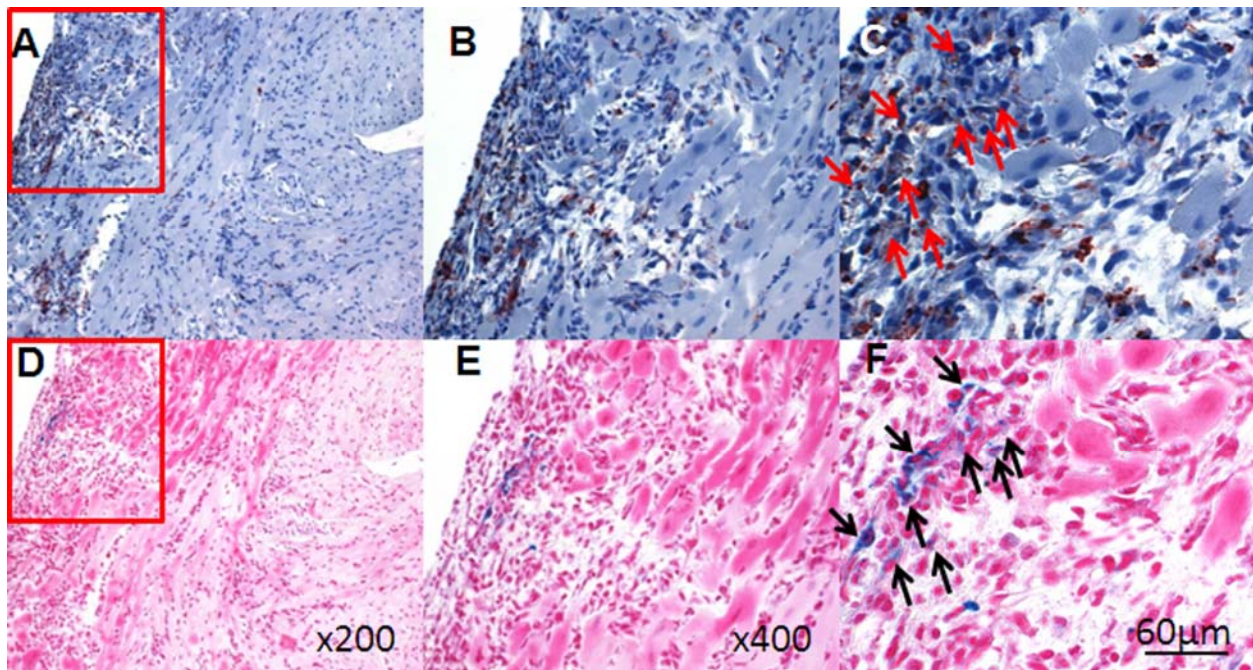

**Supplemental Table 1.** Results from linear mixed-effects model analysis for circumferential strains (Ecc) for 3 treatment groups: PBS-liposome (PBS), Clodronate-liposome (Clodronate), No Treatment (No Treatment); and 5 time points: POD 5, POD 6, POD 7, POD 8, POD 9; where POD = post operational day.

**Parameter estimates from the linear mixed-effects model**

| Effect     | F value<br>F(df <sub>n</sub> , df <sub>d</sub> ) | p       |
|------------|--------------------------------------------------|---------|
| Time       | F(4,70)=7.65                                     | <0.0001 |
| Group      | F(2,47)=2.96                                     | 0.0617  |
| Group*Time | F(5,70)=3.49                                     | 0.0071  |

\*df<sub>n</sub> = numerator degrees of freedom; df<sub>d</sub> = denominator degrees of freedom

**Estimated circumferential strains (Ecc) values for each group at each time point are expected means from the linear mixed-effects model.**

|                    | Estimate | SE     | t value<br>t(df) | p       |
|--------------------|----------|--------|------------------|---------|
| PBS POD 5          | -8.9491  | 0.9728 | t(85)=-9.20      | <0.0001 |
| PBS POD 6          | -8.1961  | 0.7739 | t(77)=-10.59     | <0.0001 |
| PBS POD 7          | -6.7415  | 0.7739 | t(77)=-8.71      | <0.0001 |
| PBS POD 8          | -4.0853  | 1.1707 | t(87)=-3.49      | 0.0008  |
| PBS POD 9          | -0.9676  | 1.2273 | t(81)=-0.79      | 0.4328  |
| Clodronate POD 5   | -6.0730  | 0.6998 | t(81)=-8.68      | <0.0001 |
| Clodronate POD 6   | -6.9274  | 0.6488 | t(80)=-10.68     | <0.0001 |
| Clodronate POD 7   | -6.7087  | 0.6329 | t(78)=-10.60     | <0.0001 |
| Clodronate POD 9   | -4.8390  | 1.2274 | t(81)=-3.94      | 0.0002  |
| No Treatment POD 5 | -7.2245  | 0.8640 | t(78)=-8.36      | <0.0001 |
| No Treatment POD 6 | -5.7824  | 0.9154 | t(81)=-6.32      | <0.0001 |
| No Treatment POD 7 | -3.0449  | 1.0753 | t(84)=-2.83      | 0.0058  |

\*SE = standard error; df = degrees of freedom

**Estimated treatment differences at each time point adjusted using Sidak approach to correct for multiple comparisons.**

| Time  | Group Comparison           | Estimate | SE     | t value<br>t(df) | Adjusted p |
|-------|----------------------------|----------|--------|------------------|------------|
| POD 9 | PBS vs Clodronate          | -3.8714  | 1.7358 | t(81)=-2.23      | 0.0289     |
| POD 7 | Clodronate vs No Treatment | 3.6638   | 1.2477 | t(82)=2.94       | 0.0134     |
| POD 7 | PBS vs No treatment        | 3.6967   | 1.3249 | t(82)=2.79       | 0.0202     |
| POD 7 | PBS vs Clodronate          | 0.03286  | 0.9997 | t(77)=0.03       | 1.0000     |
| POD 6 | Clodronate vs No Treatment | 1.1450   | 1.1220 | t(80)=1.02       | 0.6729     |
| POD 6 | PBS vs No treatment        | 2.4138   | 1.1987 | t(79)=2.01       | 0.1369     |
| POD 6 | PBS vs Clodronate          | 1.2688   | 1.0099 | t(78)=1.26       | 0.5128     |
| POD 5 | Clodronate vs No Treatment | -1.1515  | 1.1118 | t(79)=-1.04      | 0.6627     |
| POD 5 | PBS vs No treatment        | 1.7247   | 1.3011 | t(82)=1.33       | 0.4671     |
| POD 5 | PBS vs Clodronate          | 2.8762   | 1.1984 | t(84)=2.40       | 0.0560     |

\*SE = standard error; df = degrees of freedom

**Estimated time differences for each treatment group adjusted using Sidak approach for multiple comparisons.**

| Group        | Time Comparison | Estimate | SE     | t value<br>t(df) | Adjusted p |
|--------------|-----------------|----------|--------|------------------|------------|
| No treatment | POD 7 vs POD 6  | 2.7375   | 1.1287 | t(60)=2.43       | 0.0527     |
| No treatment | POD 7 vs POD 5  | 4.1796   | 1.2944 | t(83)=3.23       | 0.0057     |
| No treatment | POD 6 vs POD 5  | 1.4421   | 1.0129 | t(64)=1.42       | 0.4050     |
| Clodronate   | POD 9 vs POD 7  | 1.8696   | 1.3429 | t(86)=1.39       | 0.6689     |
| Clodronate   | POD 9 vs POD 6  | 2.0883   | 1.3750 | t(85)=1.52       | 0.5761     |
| Clodronate   | POD 9 vs POD 5  | 1.2339   | 1.4089 | t(83)=0.88       | 0.9454     |
| Clodronate   | POD 7 vs POD 6  | 0.2187   | 0.7089 | t(59)=0.31       | 0.9998     |
| Clodronate   | POD 7 vs POD 5  | -0.6357  | 0.8781 | t(83)=-0.72      | 0.9782     |
| Clodronate   | POD 6 vs POD 5  | -0.8544  | 0.7586 | t(61)=-1.13      | 0.8409     |
| PBS          | POD 9 vs POD 8  | 3.1177   | 1.2970 | t(52)=2.40       | 0.1734     |
| PBS          | POD 9 vs POD 7  | 5.7739   | 1.3775 | t(87)=4.19       | 0.0008     |
| PBS          | POD 9 vs POD 6  | 7.2285   | 1.4259 | t(86)=5.07       | <0.0001    |
| PBS          | POD 9 vs POD 5  | 7.9815   | 1.5584 | t(86)=5.12       | <0.0001    |
| PBS          | POD 8 vs POD 7  | 2.6561   | 1.2069 | t(69)=2.20       | 0.2704     |
| PBS          | POD 8 vs POD 6  | 4.1107   | 1.3340 | t(81)=3.08       | 0.0290     |
| PBS          | POD 8 vs POD 5  | 4.8638   | 1.4987 | t(86)=3.25       | 0.0178     |
| PBS          | POD 7 vs POD 6  | 1.4546   | 0.8545 | t(59)=1.70       | 0.6237     |
| PBS          | POD 7 vs POD 5  | 2.2076   | 1.1650 | t(81)=1.89       | 0.4740     |
| PBS          | POD 6 vs POD 5  | 0.7530   | 1.0161 | t(64)=0.74       | 0.9979     |

\*SE = standard error; df = degrees of freedom

**Supplemental Table 2.** Mixed model analysis for radial strains (Err) for 3 treatment groups: PBS-liposome, Clodronate-liposome, No Treatment; and 5 time points: POD 5, POD 6, POD 7, POD 8, POD 9; where POD = post operational day.

**Parameter estimates from the linear mixed-effects model**

| Effect     | F value<br>F(df <sub>n</sub> , df <sub>d</sub> ) | p       |
|------------|--------------------------------------------------|---------|
| Time       | F(4,67)=9.58                                     | <0.0001 |
| Group      | F(2,40)=3.20                                     | 0.0514  |
| Group*Time | F(5,66)=5.81                                     | 0.0002  |

\*df<sub>n</sub> = numerator degrees of freedom; df<sub>d</sub> = denominator degrees of freedom

**Estimated radial strains (Err) values for each group at each time point are expected means from the linear mixed-effects model.**

|                    | Estimate | SE     | t value<br>t(df) | p       |
|--------------------|----------|--------|------------------|---------|
| PBS POD 5          | 7.7810   | 0.9714 | t(83)=8.01       | <0.0001 |
| PBS POD 6          | 9.0806   | 0.7511 | t(82)=12.09      | <0.0001 |
| PBS POD 7          | 6.2863   | 0.7512 | t(82)=8.37       | <0.0001 |
| PBS POD 8          | 3.1508   | 1.1915 | t(83)=2.64       | 0.0098  |
| PBS POD 9          | 1.3327   | 1.1915 | t(83)=1.12       | 0.2666  |
| Clodronate POD 5   | 7.4544   | 0.6867 | t(83)=10.86      | <0.0001 |
| Clodronate POD 6   | 6.2690   | 0.6353 | t(82)=9.87       | <0.0001 |
| Clodronate POD 7   | 5.7289   | 0.6136 | t(82)=9.34       | <0.0001 |
| Clodronate POD 9   | 7.1819   | 1.1916 | t(83)=6.03       | <0.0001 |
| No Treatment POD 5 | 8.4125   | 1.0635 | t(83)=7.91       | <0.0001 |
| No Treatment POD 6 | 5.6100   | 0.9700 | t(82)=5.78       | <0.0001 |
| No Treatment POD 7 | 2.2055   | 1.0636 | t(82)=2.07       | 0.0412  |

\*SE = standard error; df = degrees of freedom

**Estimated treatment differences at each time point adjusted using Sidak approach to correct for multiple comparisons.**

| Time  | Group Comparison           | Estimate | SE     | t value<br>t(df) | Adjusted p |
|-------|----------------------------|----------|--------|------------------|------------|
| POD 9 | PBS vs Clodronate          | 5.8492   | 1.6851 | t(83)=3.47       | 0.0009     |
| POD 7 | Clodronate vs No Treatment | -3.5234  | 1.2279 | t(82)=-2.87      | 0.0164     |
| POD 7 | PBS vs No treatment        | -4.0808  | 1.3021 | t(82)=-3.13      | 0.0077     |
| POD 7 | PBS vs Clodronate          | -0.5575  | 0.9699 | t(82)=-0.57      | 0.9190     |
| POD 6 | Clodronate vs No Treatment | -0.6591  | 1.1595 | t(82)=-0.57      | 0.9214     |
| POD 6 | PBS vs No treatment        | -3.4707  | 1.2268 | t(82)=-2.83      | 0.0184     |
| POD 6 | PBS vs Clodronate          | -2.8116  | 0.9838 | t(82)=-2.86      | 0.0170     |
| POD 5 | Clodronate vs No Treatment | 0.9581   | 1.2659 | t(83)=0.76       | 0.8353     |
| POD 5 | PBS vs No treatment        | 0.6315   | 1.4404 | t(83)=0.44       | 0.9616     |
| POD 5 | PBS vs Clodronate          | -0.3266  | 1.1896 | t(83)=-0.27      | 0.9900     |

\*SE = standard error; df = degrees of freedom

**Estimated time differences for each treatment group adjusted using Sidak approach for multiple comparisons.**

| Group        | Time Comparison | Estimate | SE     | t value<br>t(df) | Adjusted p |
|--------------|-----------------|----------|--------|------------------|------------|
| No treatment | POD 7 vs POD 6  | -3.4045  | 1.3629 | t(61)=-2.50      | 0.0443     |
| No treatment | POD 7 vs POD 5  | -6.2070  | 1.4343 | t(65)=-4.33      | 0.0002     |
| No treatment | POD 6 vs POD 5  | -2.8025  | 1.3799 | t(67)=-2.03      | 0.1325     |
| Clodronate   | POD 9 vs POD 7  | 1.4530   | 1.3166 | t(77)=1.10       | 0.8533     |
| Clodronate   | POD 9 vs POD 6  | 0.9128   | 1.3251 | t(77)=0.69       | 0.9831     |
| Clodronate   | POD 9 vs POD 5  | -0.2725  | 1.3566 | t(79)=-0.20      | 1.0000     |
| Clodronate   | POD 7 vs POD 6  | -0.5402  | 0.8372 | t(61)=-0.65      | 0.9879     |
| Clodronate   | POD 7 vs POD 5  | -1.7255  | 0.8818 | t(66)=-1.96      | 0.2860     |
| Clodronate   | POD 6 vs POD 5  | -1.1854  | 0.8893 | t(62)=-1.33      | 0.7115     |
| PBS          | POD 9 vs POD 8  | -1.8181  | 1.5815 | t(57)=-1.15      | 0.9469     |
| PBS          | POD 9 vs POD 7  | -4.9537  | 1.3622 | t(69)=-3.64      | 0.0054     |
| PBS          | POD 9 vs POD 6  | -7.7480  | 1.3623 | t(69)=-5.69      | <.0001     |
| PBS          | POD 9 vs POD 5  | -6.4483  | 1.5032 | t(73)=-4.29      | 0.0006     |
| PBS          | POD 8 vs POD 7  | -3.1355  | 1.3622 | t(69)=-2.30      | 0.2197     |
| PBS          | POD 8 vs POD 6  | -5.9298  | 1.3623 | t(69)=-4.35      | 0.0005     |
| PBS          | POD 8 vs POD 5  | -4.6302  | 1.5032 | t(73)=-3.08      | 0.0297     |
| PBS          | POD 7 vs POD 6  | -2.7943  | 1.0072 | t(61)=-2.77      | 0.0696     |
| PBS          | POD 7 vs POD 5  | -1.4946  | 1.1847 | t(68)=-1.26      | 0.9071     |
| PBS          | POD 6 vs POD 5  | 1.2996   | 1.1747 | t(64)=1.11       | 0.9585     |

\*SE = standard error; df = degrees of freedom
